# Supplementary material
Source: MDPI journal article supplement (https://www.mdpi.com/search?q=molecules-23-03028)
Supplement: s001 [file molecules-23-03028-s001.pdf]

# Chemometric Assessment and Best-fit Function Modelling of the Toxic Potential of Selected Food Packaging Extracts

Błażej Kudłak <sup>1,\*</sup>, Natalia Szczepańska <sup>1</sup>, Mirosława Nedyalkova <sup>2</sup>, Vasil Simeonov <sup>3</sup> and Jacek Namieśnik <sup>1</sup>

<sup>1</sup> Department of Analytical Chemistry, Faculty of Chemistry, Gdańsk University of Technology, 11/12 Narutowicza, 80-233 Gdańsk, Poland; nataliaszczepanska@vp.pl (N.S.); [chemanal@pg.edu.pl](mailto:chemanal@pg.edu.pl) (J.N.)

<sup>2</sup> Chair of Inorganic Chemistry, Faculty of Chemistry and Pharmacy, University of Sofia "St. Kl. Okhridski", 1, J. Bourchier Blvd., 1164 Sofia, Bulgaria; mici345@yahoo.com

<sup>3</sup> Chair of Analytical Chemistry, Faculty of Chemistry and Pharmacy, University of Sofia "St. Kl. Okhridski", 1, J. Bourchier Blvd., 1164 Sofia, Bulgaria; vsimeonov@chem.uni-sofia.bg

\* Correspondence: [blakudla@pg.edu.pl](mailto:blakudla@pg.edu.pl); Tel.: +48-58-347-2128

**Table S1.** Summarized presentation of the quadratic regression coefficient for different experimental conditions and media\*

| Medium_T | 12h   | 48h   | 2 weeks | Long term |
|----------|-------|-------|---------|-----------|
| W_RT     | 0.23  | -0.65 | -0.25   | -1.20     |
| W_65     | -1.08 | -1.08 | -2.72   | -1.84     |
| W_121    | -0.11 | -1.33 | -0.52   | -0.11     |
| AC_RT    | -0.55 | -0.42 | -0.21   | -0.23     |
| AC_65    | -0.36 | -3.94 | -0.46   | -0.23     |
| AC_121   | -0.55 | -0.42 | -0.21   | -0.23     |
| Et_RT    | 0.21  | 0.38  | -1.36   | -1.70     |
| Et_65    | -0.02 | -0.65 | -0.67   | -0.89     |
| Et_121   | -0.41 | -0.96 | -0.19   | -0.89     |
| DMSO_RT  | -1.86 | -1.90 | -1.69   | -1.83     |
| DMSO_65  | -0.21 | -0.88 | -0.94   | -2.11     |
| DMSO_121 | -0.24 | -0.96 | -1.37   | -0.99     |

\* since temperature conditions the exposure time at room slightly differ from the time exposures for the other temperatures "long term" column presents models for period longer than 2 weeks

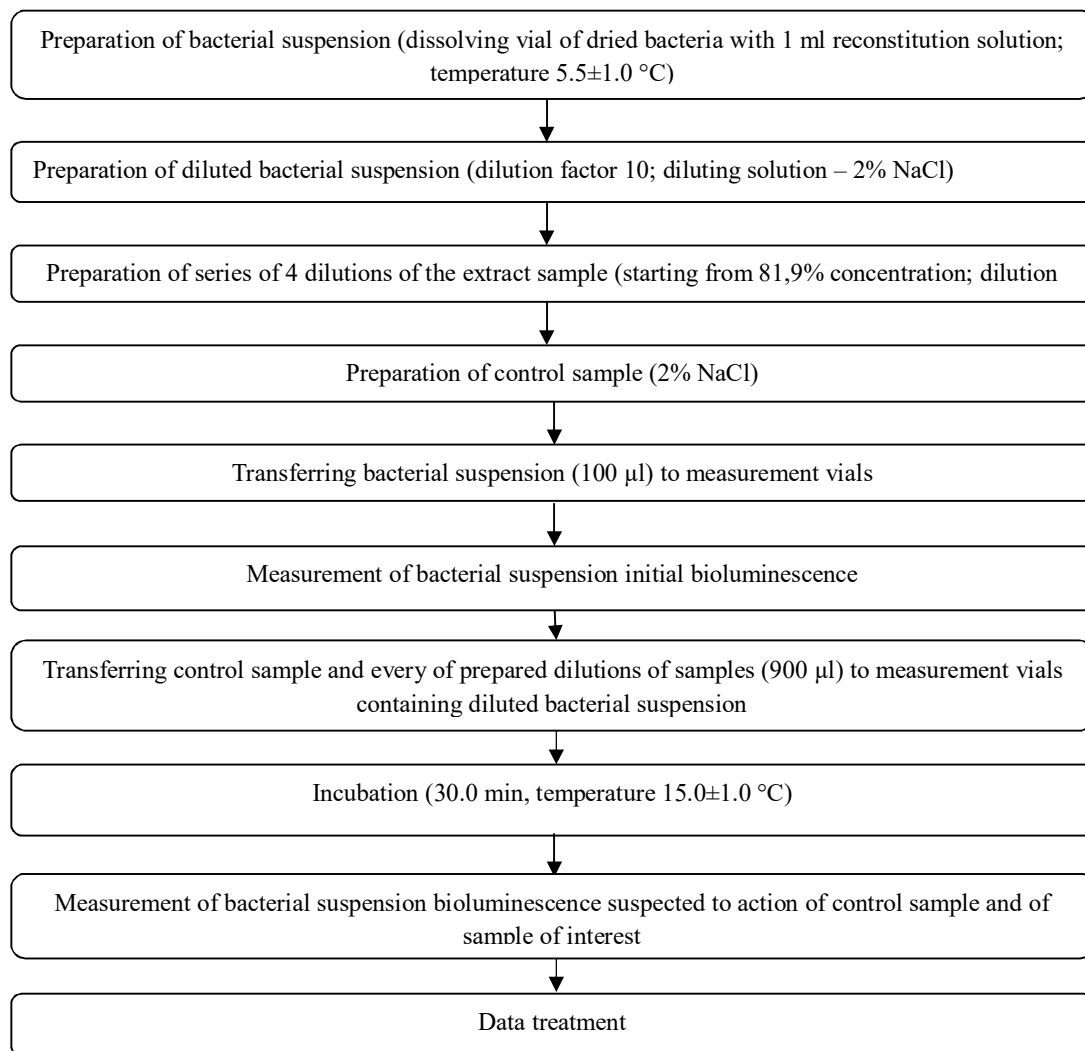

**Figure S1.** Analytical methodology of acute toxicity determination in the studies presented.

**Table S2.** Models obtained for each extraction medium, times of extraction and temperatures

| Water/room temperature |                                   |       | Acetic acid/room temperature        |       | Ethanol/room temperature         |       | DMSO/room temperature            |       |
|------------------------|-----------------------------------|-------|-------------------------------------|-------|----------------------------------|-------|----------------------------------|-------|
| Time                   | Polynomial model                  | $R^2$ | Polynomial model                    | $R^2$ | Polynomial model                 | $R^2$ | Polynomial model                 | $R^2$ |
| 12h                    | $y = 0.228x^2 - 0.349x$           | 0.98  | $y = -0.558x^2 + 0.913x + 0.226$    | 0.99  | $y = 0.207x^2 + 0.684x - 0.226$  | 0.99  | $y = -1.859x^2 + 2.705x - 0.273$ | 0.99  |
| 48h                    | $y = -0.651x^2 + 1.691x$          | 0.98  | $y = -0.416x^2 + 0.549x + 0.839$    | 0.93  | $y = 0.376x^2 + 0.390x - 0.106$  | 0.99  | $y = -1.897x^2 + 3.028x - 0.342$ | 0.94  |
| 2 weeks                | $y = -0.249x^2 + 0.912x$          | 0.97  | $y = -0.208x^2 + 0.259x + 0.934$    | 0.9   | $y = -1.361x^2 + 2.62x - 0.41$   | 0.99  | $y = -1.686x^2 + 2.399x - 0.067$ | 1.00  |
| 4 months               | $y = -1.203x^2 + 1.545x + 0.443$  | 0.96  | $y = -0.233x^2 + 0.315x + 0.905$    | 0.98  | $y = -1.705x^2 + 2.309x + 0.149$ | 0.89  | $y = -1.830x^2 + 2.662x + 0.065$ | 0.99  |
| 6 months               | $y = -1.624x^2 + 2.1103x + 0.269$ | 0.93  | $y = -0.4236x^2 + 0.5746x + 0.8092$ | 0.89  | $y = -1.181x^2 + 1.528x + 0.463$ | 0.91  | No model possible                | -     |

| Water/65 °C   |                                  |       | Water/121 °C                     |       | Acetic acid/65 °C                |       | Acetic acid/121 °C               |       |
|---------------|----------------------------------|-------|----------------------------------|-------|----------------------------------|-------|----------------------------------|-------|
| Time          | Polynomial model                 | $R^2$ | Polynomial model                 | $R^2$ | Polynomial model                 | $R^2$ | Polynomial model                 | $R^2$ |
| 12h           | $y = -1.082x^2 + 1.906x$         | 0.96  | $y = -0.111x^2 + 0.997x$         | 0.98  | $y = -0.356x^2 + 0.461x + 0.872$ | 0.99  | $y = -0.356x^2 + 0.461x + 0.872$ | 0.99  |
| 48h           | $y = -1.082x^2 + 1.906x$         | 0.96  | $y = -1.331x^2 + 2.016x$         | 0.99  | $y = -3.93x^2 + 4.80x - 0.1725$  | 0.78  | $y = -0.314x^2 + 0.455x + 0.820$ | 0.98  |
| 2 weeks       | $y = -2.721x^2 + 3.409x$         | 0.85  | $y = -0.517x^2 + 1.369x$         | 0.99  | $y = -0.460x^2 + 0.662x + 0.694$ | 0.97  | $y = -0.502x^2 + 0.672x + 0.786$ | 0.87  |
| 2 weeks 2x    | $y = -1.838x^2 + 2.616x$         | 0.99  | $y = -0.111x^2 + 0.997x$         | 0.98  | $y = -0.227x^2 + 0.324x + 0.891$ | 0.98  | $y = -0.344x^2 + 0.454x + 0.857$ | 0.95  |
| Ethanol/65 °C |                                  |       | Ethanol/121 °C                   |       | DMSO/65 °C                       |       | DMSO/121 °C                      |       |
| Time          | Polynomial model                 | $R^2$ | Polynomial model                 | $R^2$ | Polynomial model                 | $R^2$ | Polynomial model                 | $R^2$ |
| 12h           | $y = -0.017x^2 + 0.964x - 0.069$ | 1.000 | $y = -0.408x^2 + 1.347x - 0.291$ | 0.99  | $y = -0.215x^2 + 0.509x - 0.003$ | 0.99  | $y = -0.237x^2 + 0.852x - 0.021$ | 1.00  |
| 48h           | $y = -0.655x^2 + 1.659x - 0.208$ | 1.000 | $y = -0.955x^2 + 1.868x - 0.193$ | 0.99  | $y = -0.884x^2 + 1.766x - 0.183$ | 0.99  | $y = -0.962x^2 + 1.578x + 0.18$  | 0.99  |
| 2 weeks       | $y = -0.666x^2 + 1.459x - 0.107$ | 0.99  | $y = -0.187x^2 + 0.888x - 0.167$ | 0.99  | $y = -0.942x^2 + 1.682x - 0.098$ | 0.99  | $y = -1.369x^2 + 1.989x - 0.011$ | 0.98  |
| 2 weeks 2x    | $y = -0.891x^2 + 1.779x - 0.238$ | 0.99  | $y = -0.889x^2 + 1.632x - 0.096$ | 0.99  | $y = -2.105x^2 + 2.865x - 0.256$ | 0.99  | $y = -0.992x^2 + 1.597x + 0.059$ | 0.99  |

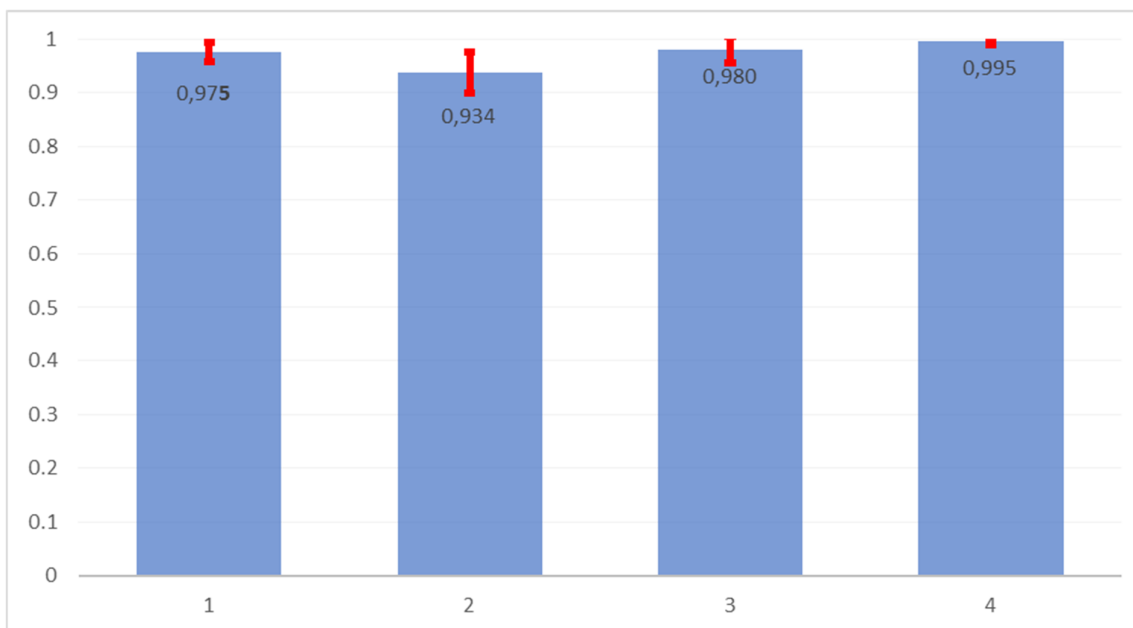

Figure S2. Confidence intervals (95%) of  $r^2$  for the extraction media – water (1), acetic acid (2), ethanol (3) and DMSO (4).
